# Supplementary material for: DBN-based ionic liquids with high capability for the dissolution of wool keratin
Source: Royal Society of Chemistry journal article supplement (doi:10.1039/c6ra26057h), 2017-01-01
Supplement: c6ra26057h1.pdf [file c6ra26057h1.pdf]

# DBN-based ionic liquids for wool keratin dissolution with high capability

*Xue Liu<sup>a</sup>, Yi Nie<sup>b,\*</sup>, Xianglei Meng<sup>b</sup>, Zhenlei Zhang<sup>b</sup>, Xiangping Zhang<sup>b</sup>, Suojiang Zhang<sup>b,\*</sup>*

<sup>a</sup>College of Chemistry and Chemical Engineering, Qufu Normal University,

Shandong, 273165, China.

<sup>b</sup>Beijing Key Laboratory of Ionic Liquids Clean Process, Key Laboratory of

Green Process and Engineering, State Key Laboratory of Multiphase

Complex Systems, Institute of Process Engineering, Chinese Academy

Of Sciences, Beijing, 100190, China.

## Supplementary Information

### Synthesis and Characterization of ionic liquids

**Table S1.** Electronic spray mass spectrum analysis and water content of IL

| ILs       | cation(m/z) | negion(m/z) | water content(ppm) |
|-----------|-------------|-------------|--------------------|
| [DBNE]DEP | 153.1391    | 153.0311    | 964                |
| [Emim]DEP | 111.0917    | 153.0311    | 1310               |
| [DBNM]DMP | 139.1213    | 124.9995    | 1805               |
| [Emim]DMP | 111.0901    | 124.9992    | 641                |
| [DBNH]OAc | 125.1078    | /           | 1140               |

### <sup>1</sup>H-NMR Analysis of ILs: (600 MHz, DMSO)

**[DBNE]DEP:**  $\delta_{\text{ppm}}$  = 3.65 (t, 2H), 3.58(m, 4H), 3.43(m, 2H), 3.39(m, 2H), 3.03(t, 2H), 2.04(m, 2H), 1.98(m, 2H), 1.17(t, 3H), 1.05(t, 6H)

**[DBNE]DMP:**  $\delta_{\text{ppm}}$  = 3.65 (m, 2H), 3.37(t, 2H), 3.33(t, 2H), 3.24(d, 3H), 3.10(s, 6H), 3.00(t, 2H), 2.03(m, 2H), 1.98(m, 2H)

**[DBNH]OAc:**  $\delta_{\text{ppm}}$  = 3.57 (t, 2H), 3.35(t, 2H), 3.31(m, 2H), 3.28(t, 2H), 3.14(t, 2H), 2.80(t, 2H), 2.20(m, 2H), 2.02(m, 2H), 1.90(m, 2H), 1.80(d, 3H), 1.74(s, 3H)

**[Emim]DEP:**  $\delta_{\text{ppm}}$  = 9.79 (s, 1H), 7.95(t, 1H), 7.85(t, 1H), 4.25(q, 2H), 3.91(s, 3H), 3.66(m, 4H), 1.43(t, 3H), 1.08(t, 6H)

**[Emim]DMP:**  $\delta_{\text{ppm}}$  = 9.58 (s, 1H), 7.88(t, 1H), 7.82(t, 1H), 4.22(m, 3H), 3.88(s, 2H), 3.29(d, 6H), 1.42(t, 3H)

## Recycling of ionic liquids

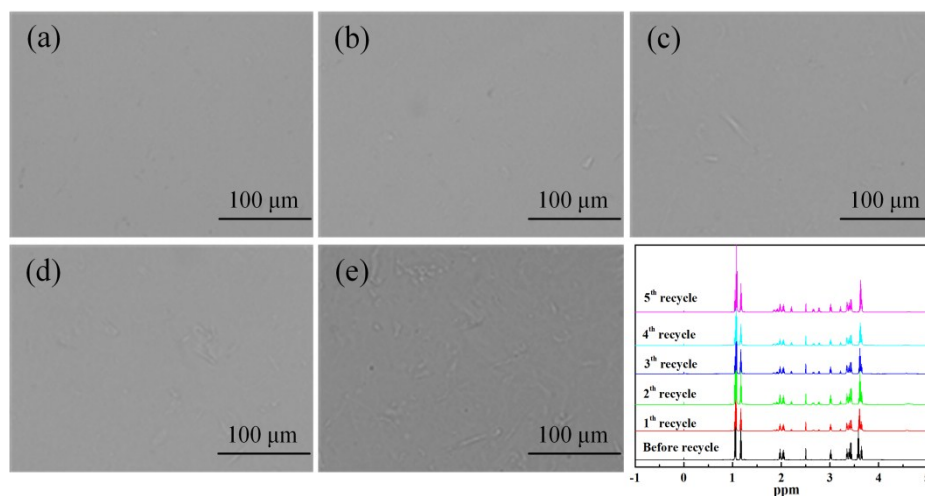

Note: All experiments are conducted at 393 K with 8% wool keratin

**Fig. S1.** Dissolution process of wool fiber in [DBNE]DEP after 3 h at the first time (a), second time (b), third time (c), fourth time (d), fifth time (e) and the structures of ionic liquid after every recycle.

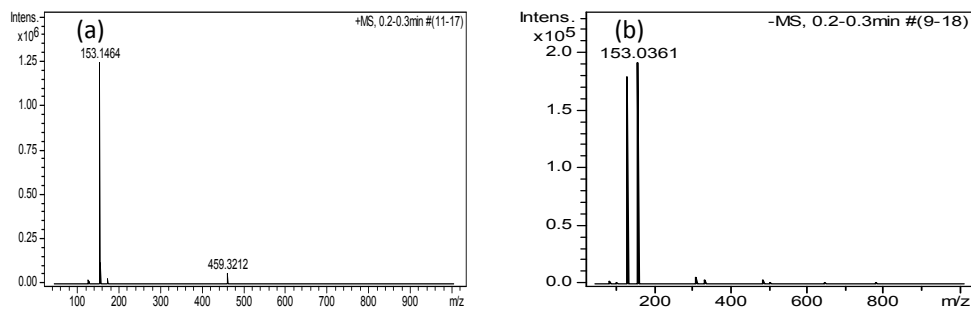

**Fig. S2** Electronic spray mass spectra of cation (a) and anions (b) of 5th recycled IL.

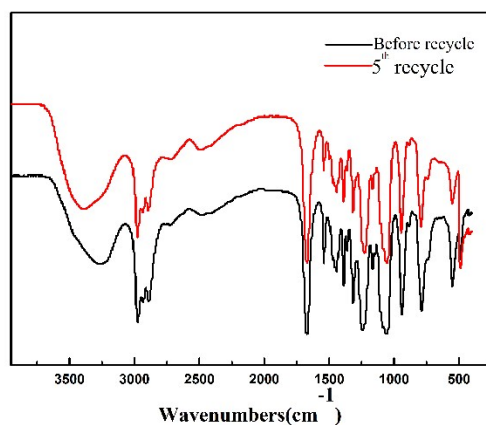

**Fig. S3** FT-IR spectra of 5th recycled IL and before recycled IL.

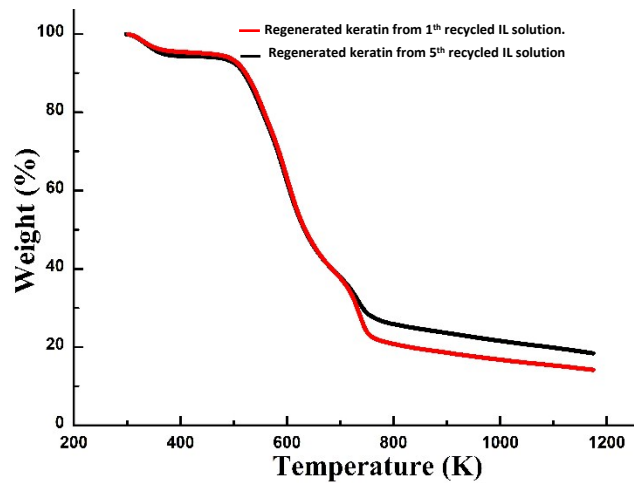

Fig.S4 TGA curves of the regenerated keratins from 5<sup>th</sup> recycled and 1<sup>st</sup> recycled ILs solutions.
